# Supplementary material
Source: PubMed Central journal article supplement (PMC3945881)

A

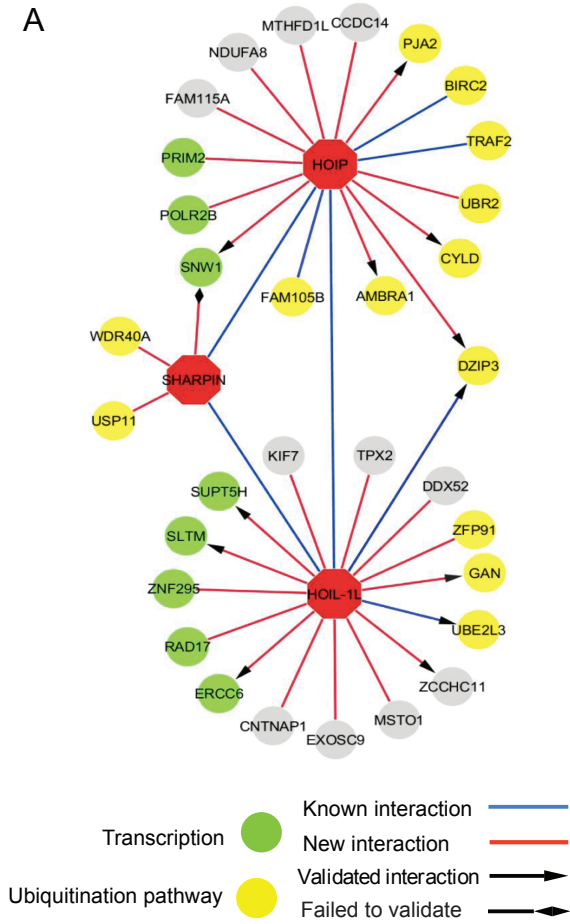

B

|             |   |   |   |   |   |   |
|-------------|---|---|---|---|---|---|
| Flag-UBE2D3 | - | + | - | + | - | + |
| HA-HOIL-1L  | + | + | - | - | - | - |
| HA-HOIP     | - | - | + | + | - | - |
| HA-SHARPIN  | - | - | - | - | + | + |

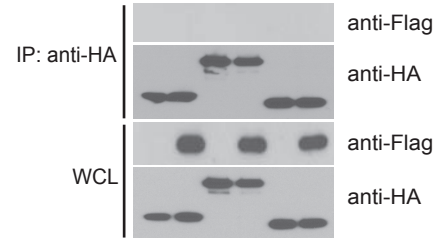

C

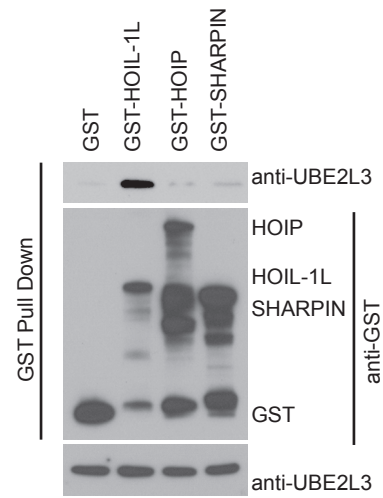

Supplement: cr2013133x1.pdf [file cr2013133x1.pdf]

**A**

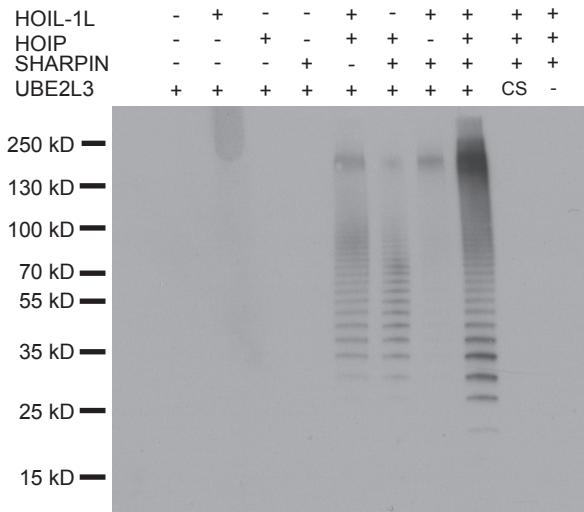

**B**

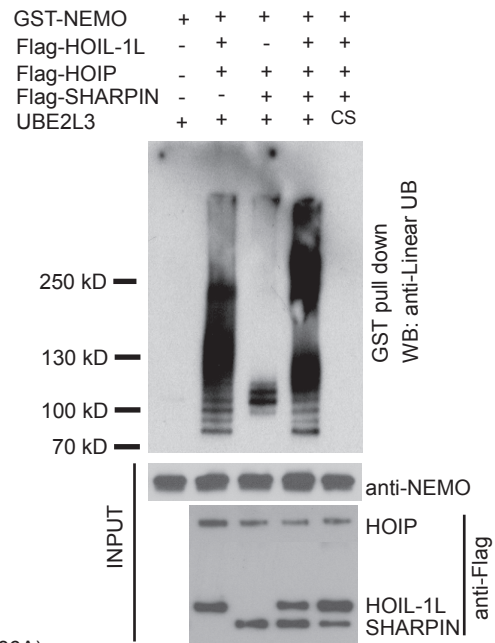

**C**

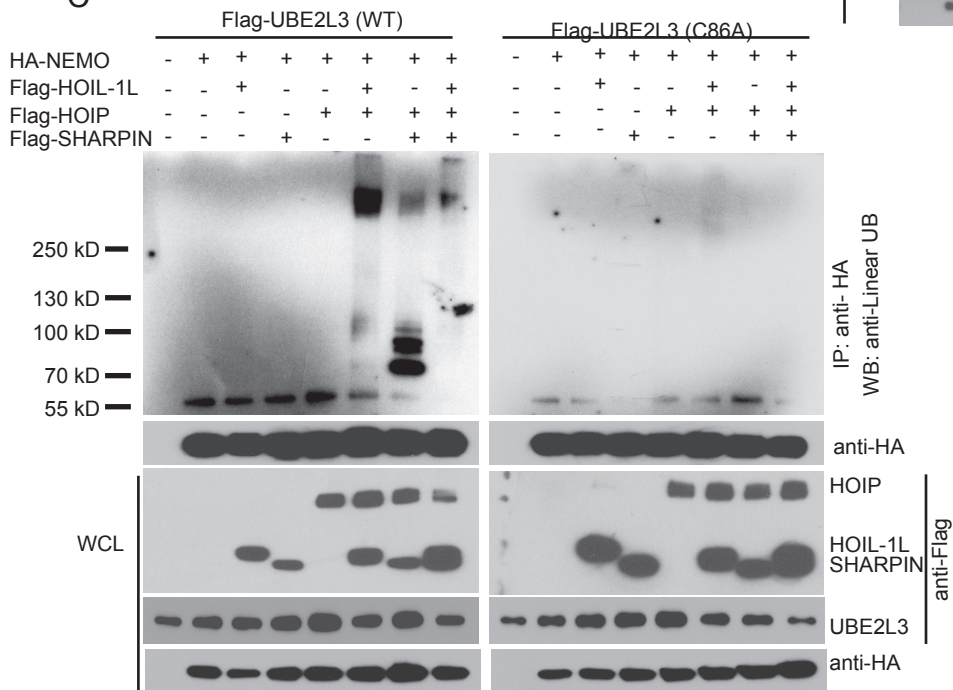

Supplement: cr2013133x2.pdf [file cr2013133x2.pdf]

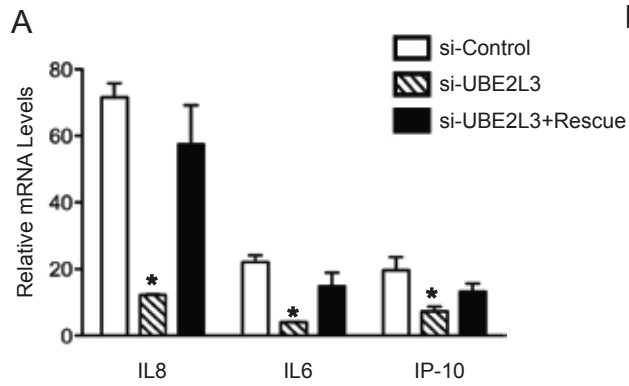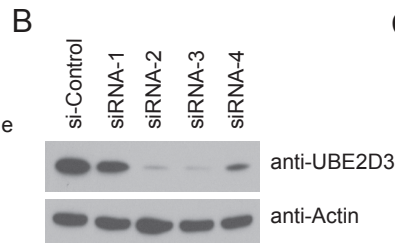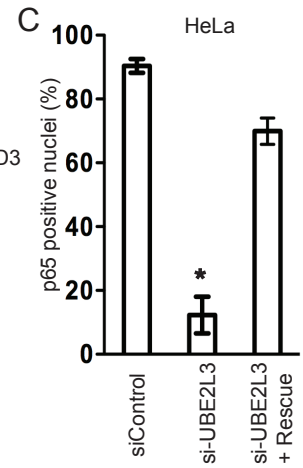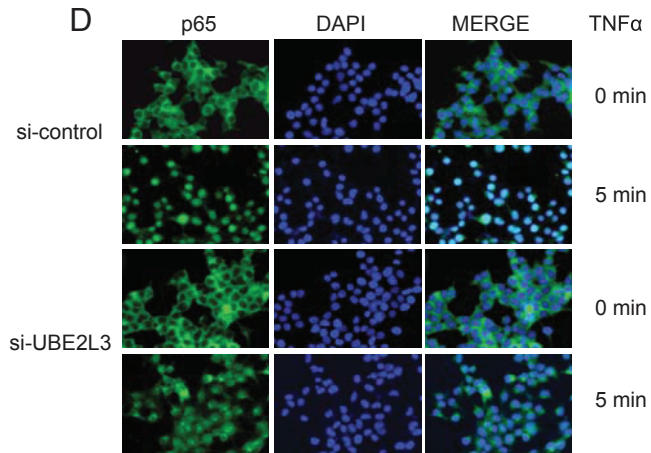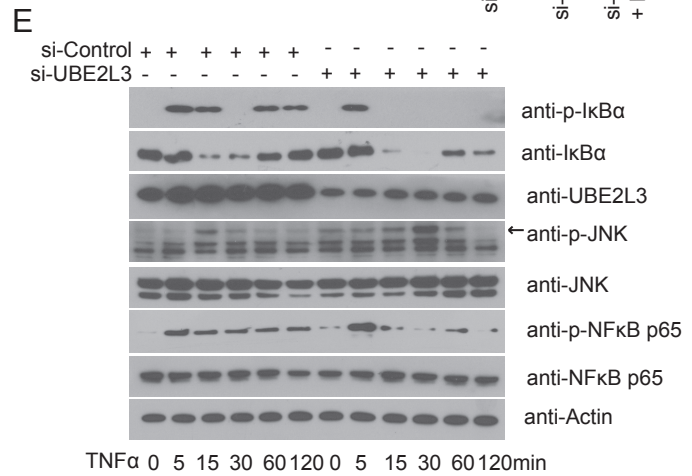

Supplement: cr2013133x3.pdf [file cr2013133x3.pdf]
